# Supplementary material for: Oxidative cleavage of some cellulosic substrates by auxiliary activity (AA) family 9 enzymes influences the adsorption/desorption of hydrolytic cellulase enzymes
Source: Royal Society of Chemistry journal article supplement (doi:10.1039/c6gc02288j), 2016-01-01
Supplement: c6gc02288j1.pdf [file c6gc02288j1.pdf]

## Supplementary Information

**Table S1. The crystallinity index (CrI) of various cellulosic substrates measured by X-Ray Diffraction (XRD) analysis**

|                      | CrI (%)    |
|----------------------|------------|
| <b>CNC</b>           | 83.4 ± 2.9 |
| <b>Avicel</b>        | 66.1 ± 1.6 |
| <b>DSP</b>           | 59.0 ± 1.9 |
| <b>PASC</b>          | 43.2 ± 0.8 |
| <b>Cellulose II</b>  | 45.2 ± 2.1 |
| <b>Cellulose III</b> | 53.1 ± 0.7 |

*CNC: cellulose nanocrystalline; DSP: dissolving pulp; PASC: phosphoric acid swollen cellulose; and mercerized (cellulose II, cellulose III) cellulosic substrates*

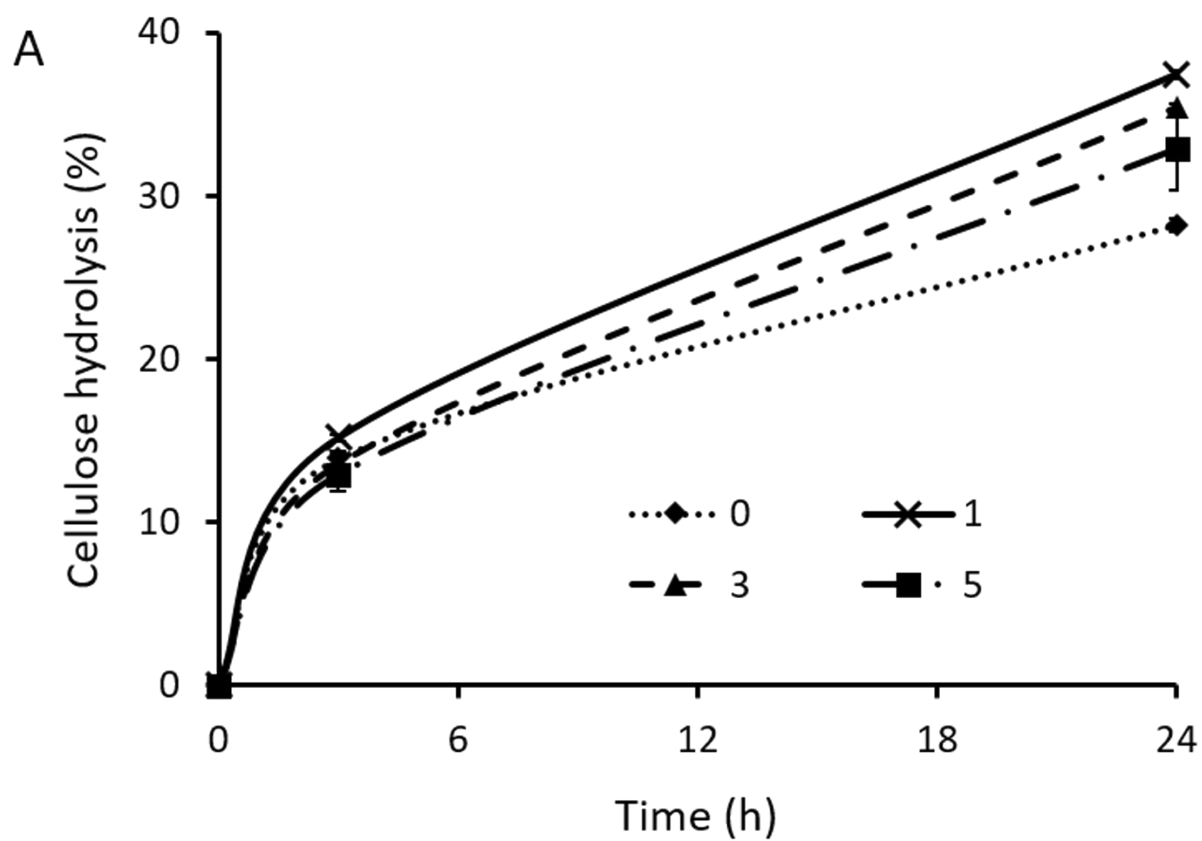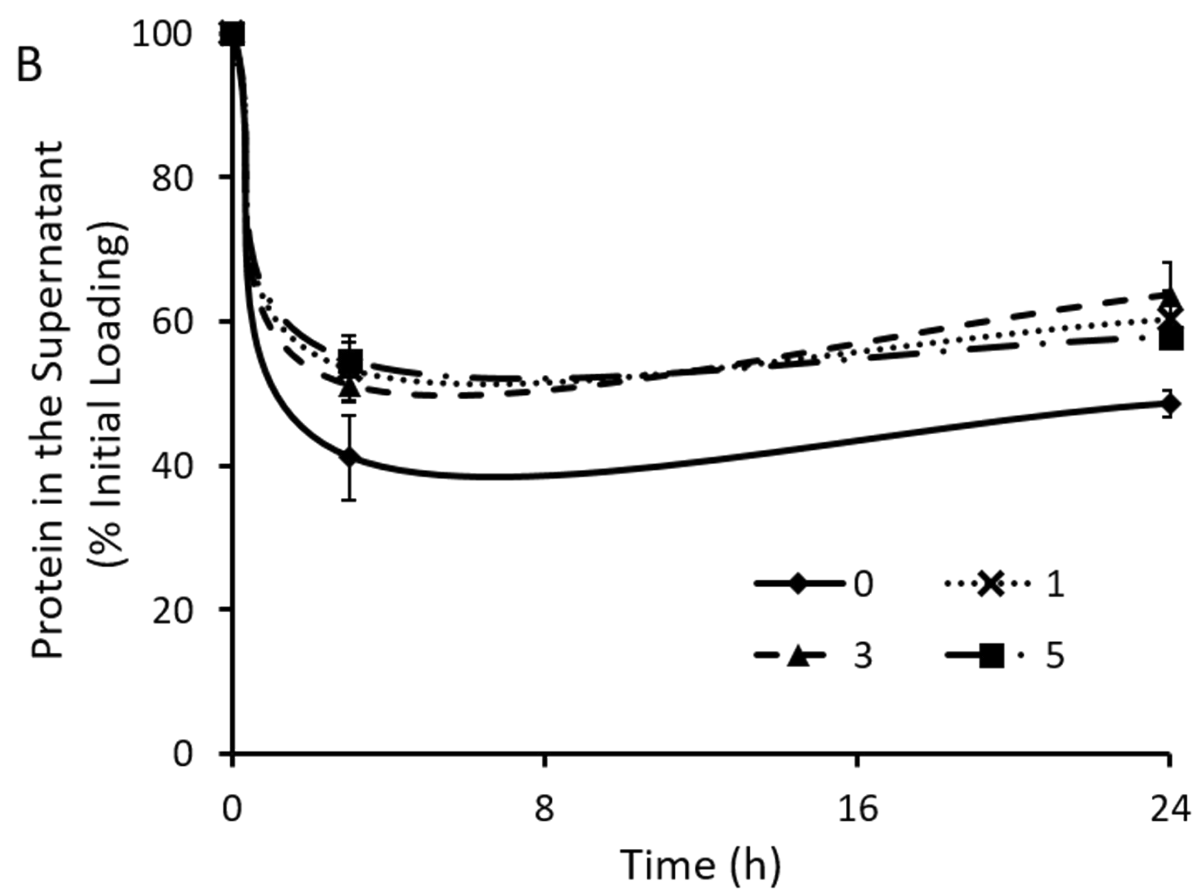

**Fig S1. The cellulose hydrolysis (A) and protein adsorption (B) during time course of hydrolysis of Avicel substrate with the “cellulase mixture” (13 mg/g glucan of Celluclast and 5 mg/g glucan of Novozyme 188) with and without supplementation of various amount AA9. AA9 loadings: 0 (◆), 1 (×), 3 (▲), and 5 (■) mg/g glucan.**

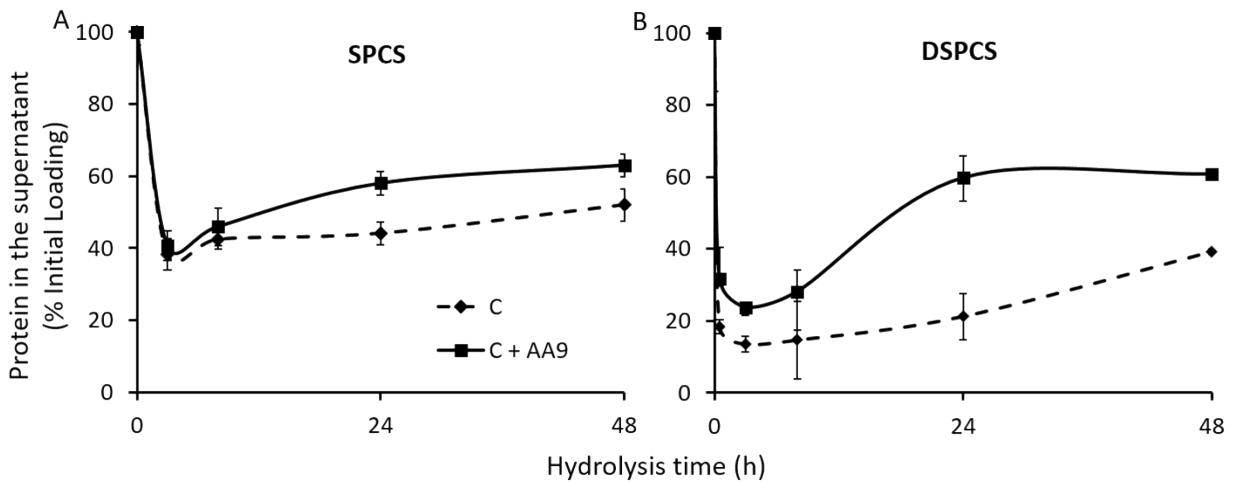

**Fig S2. The adsorption/desorption profile of “the cellulase mixture/protein” during time course of hydrolysis of steam pretreated corn stover (SPCS) (A) and delignified SPCS (DSPCS) (B) of the “cellulase mixture” (13 mg/g glucan of Celluclast and 5 mg/g glucan of Novozyme 188) with (solid lines) and without (dashed lines) supplementation of 1mg AA9/g glucan.**

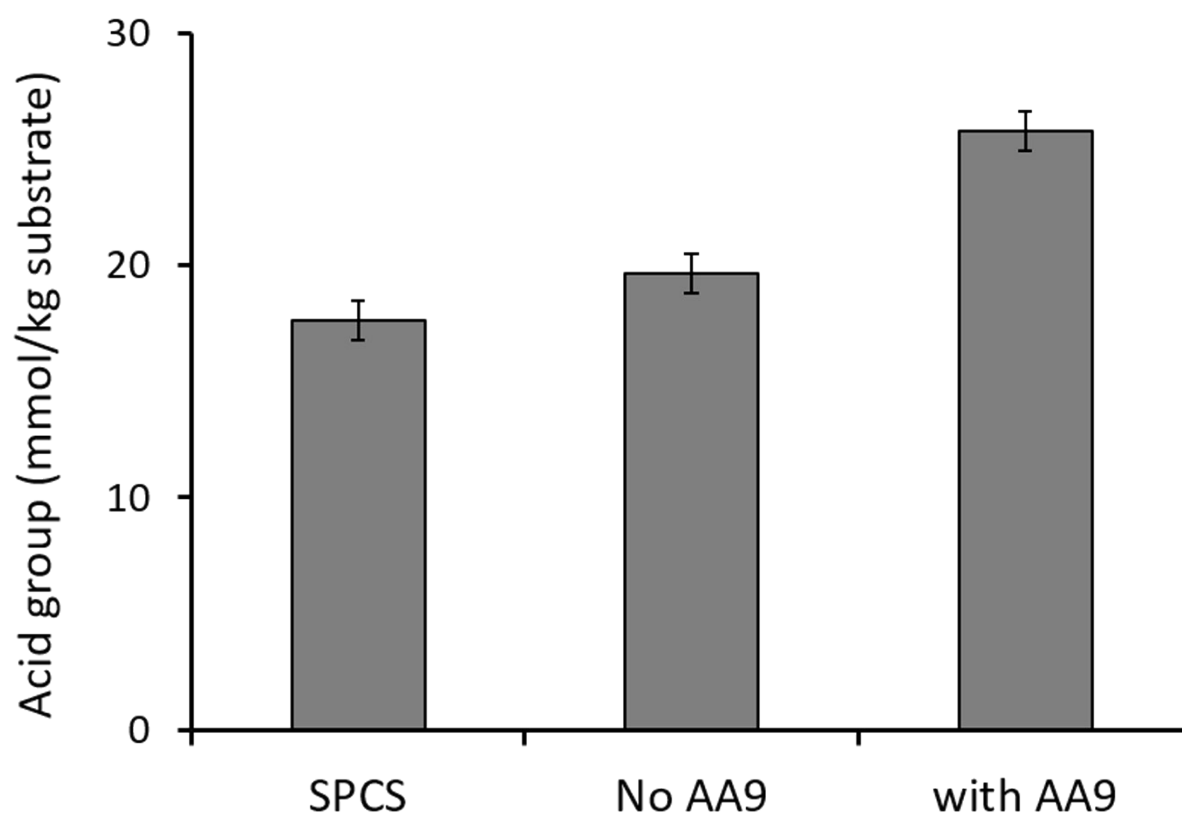

**Fig S3. The acid group content of the steam pretreated corn stover (SPCS) and their hydrolysis residues after 24h enzymatic hydrolysis by the “cellulase mixture” (13 mg/g glucan of Celluclast and 5 mg/g glucan of Novozyme 188) with and without supplementation of 1mg AA9/g glucan.**
